# Supplementary material for: Tripling magnetite's thermoelectric figure of merit with rare earth doping
Source: Royal Society of Chemistry journal article supplement (doi:10.1039/d4tc03153a), 2024-01-01
Supplement: d4tc03153a1.pdf [file d4tc03153a1.pdf]

# Supporting Information

## Tripling Magnetite's Thermoelectric Figure of Merit with Rare Earth Doping

Kabir S. Suraj<sup>a,b,\*</sup>, Hossein Asnaashari Eivari<sup>c</sup>, Gen Tatara<sup>b</sup>, M. Hussein N. Assadi<sup>b,\*\*</sup>

<sup>a</sup>*African University of Science and Technology, Km 10 Airport Road, Galadimawa, 900107, Abuja, Nigeria.*

<sup>b</sup>*RIKEN Center for Emergent Matter Science, 2-1 Hirosawa, Wako, 351-0198, Saitama, Japan.*

<sup>c</sup>*Physics Department, University of Zabol, 98613-35856, Zabol, Iran.*

### Supplementary Figures

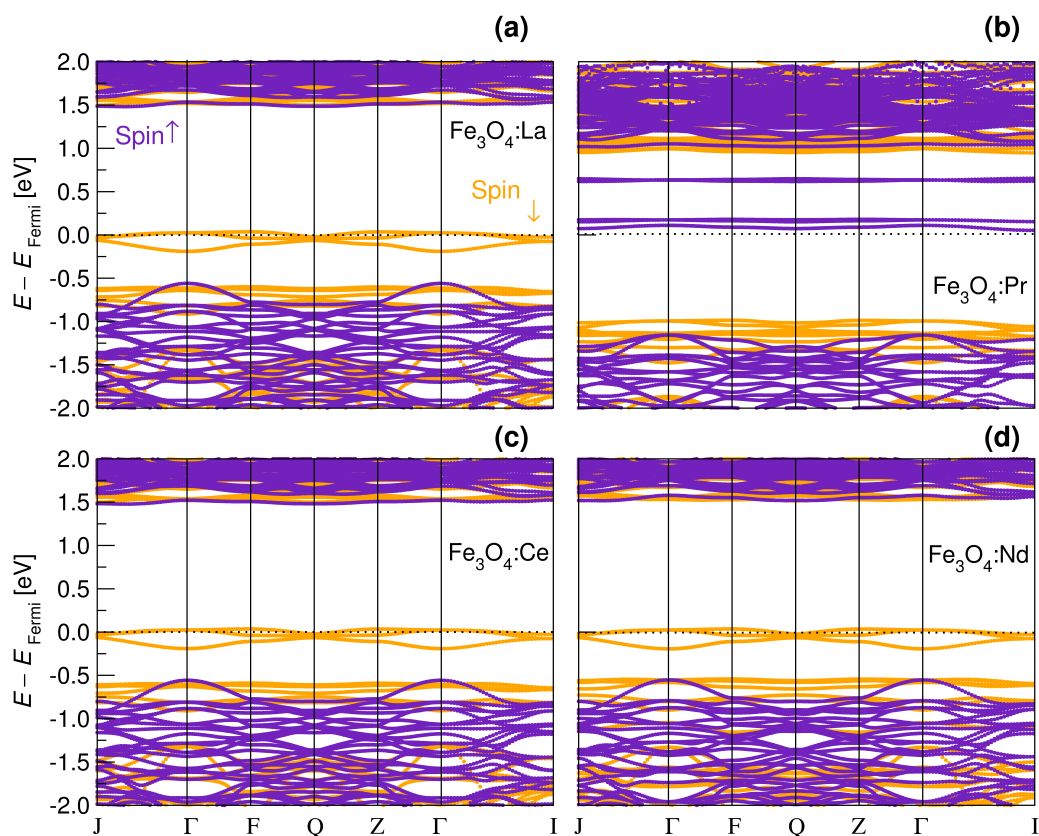

Figure S1: (a) through (d) The band structure of the  $\text{Fe}_3\text{O}_4:\text{RE}$  compounds. Purple and orange lines represent spin-up and spin-down bands, respectively.

\*Corresponding Author

\*\*Corresponding Author

*Email addresses:* kabirsalihu.suraj@riken.jp (Kabir S. Suraj), h.assadi.2008@ieee.org (M. Hussein N. Assadi)

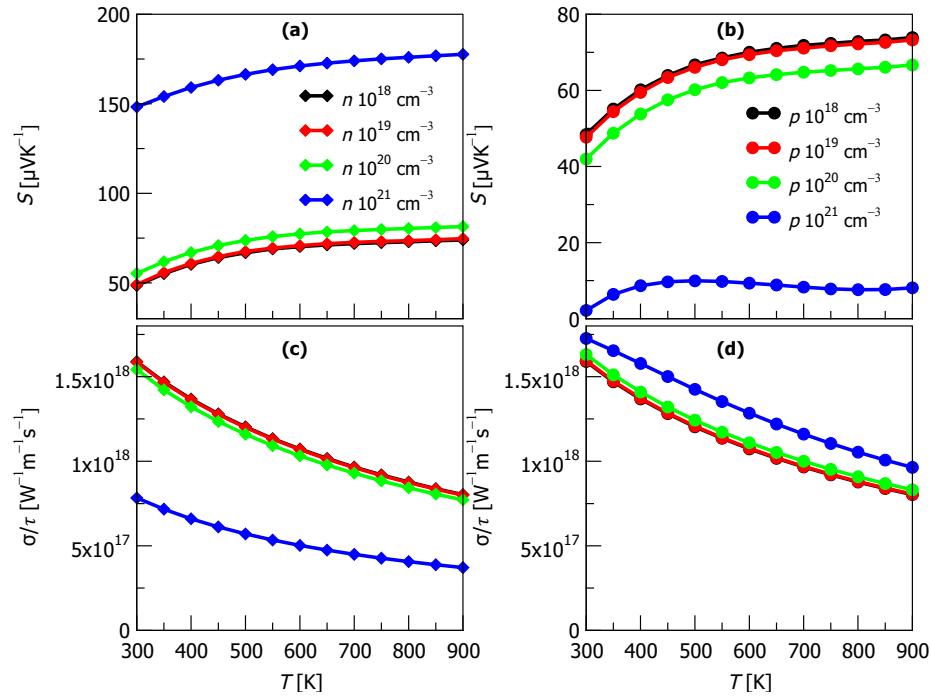

Figure S2: (a) and (b) Predicted  $S$  values for  $\text{Fe}_3\text{O}_4:\text{La}$  as a function of temperature for different doping concentrations. (c) and (d) The electrical conductivity per relaxation time ( $\sigma/\tau$ ) for  $\text{Fe}_3\text{O}_4:\text{La}$ .

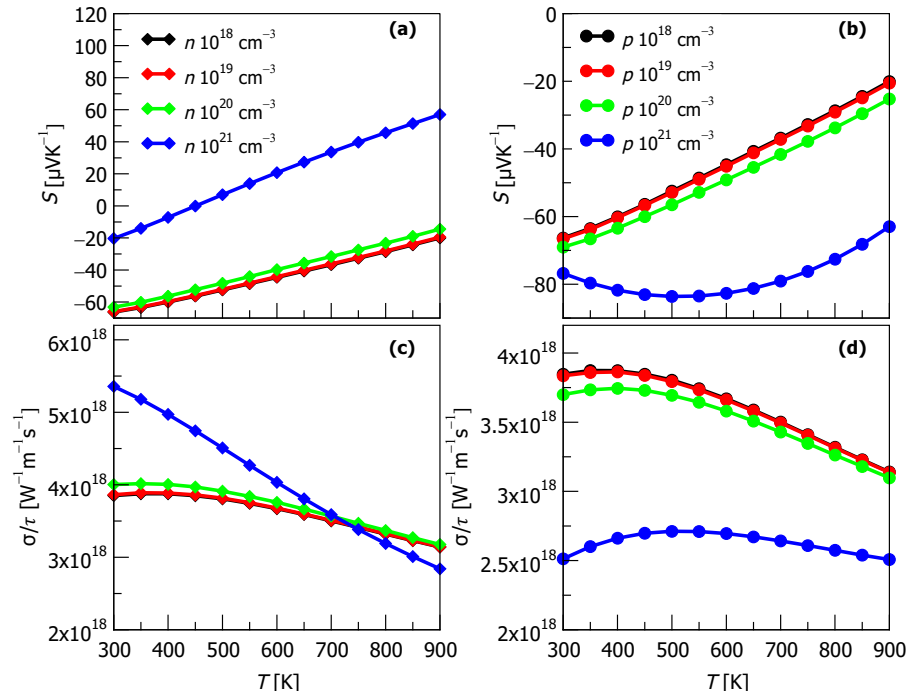

Figure S3: (a) and (b) Predicted  $S$  values for  $\text{Fe}_3\text{O}_4:\text{Ce}$  as a function of temperature for different doping concentrations. (c) and (d) The electrical conductivity per relaxation time ( $\sigma/\tau$ ) for  $\text{Fe}_3\text{O}_4:\text{Ce}$ .

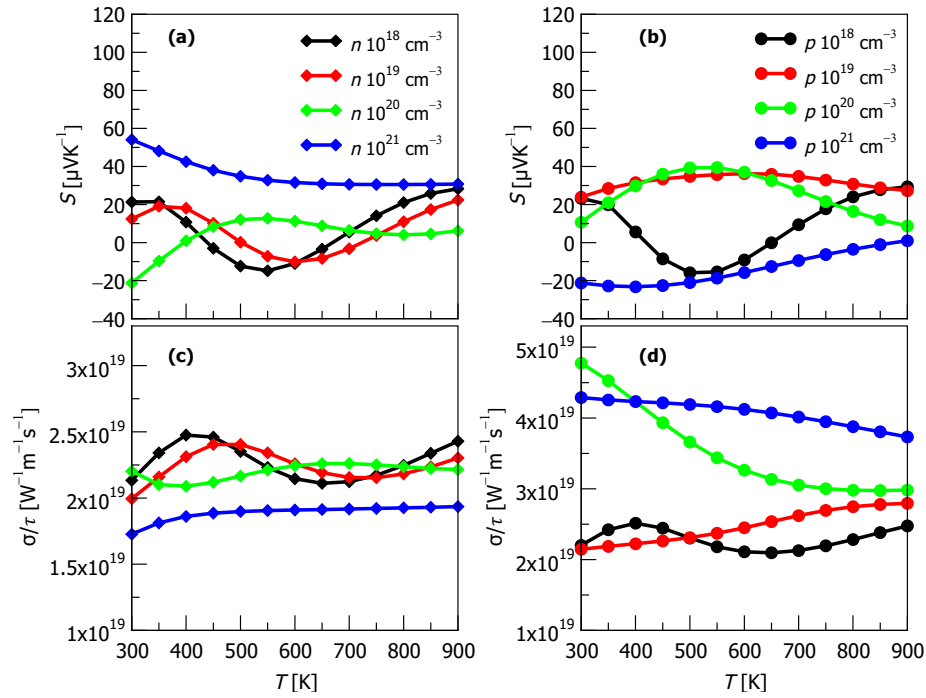

Figure S4: (a) and (b) Predicted  $S$  values for  $\text{Fe}_3\text{O}_4:\text{Pr}$  as a function of temperature for different doping concentrations. (c) and (d) The electrical conductivity per relaxation time ( $\sigma/\tau$ ) for  $\text{Fe}_3\text{O}_4:\text{Pr}$ .

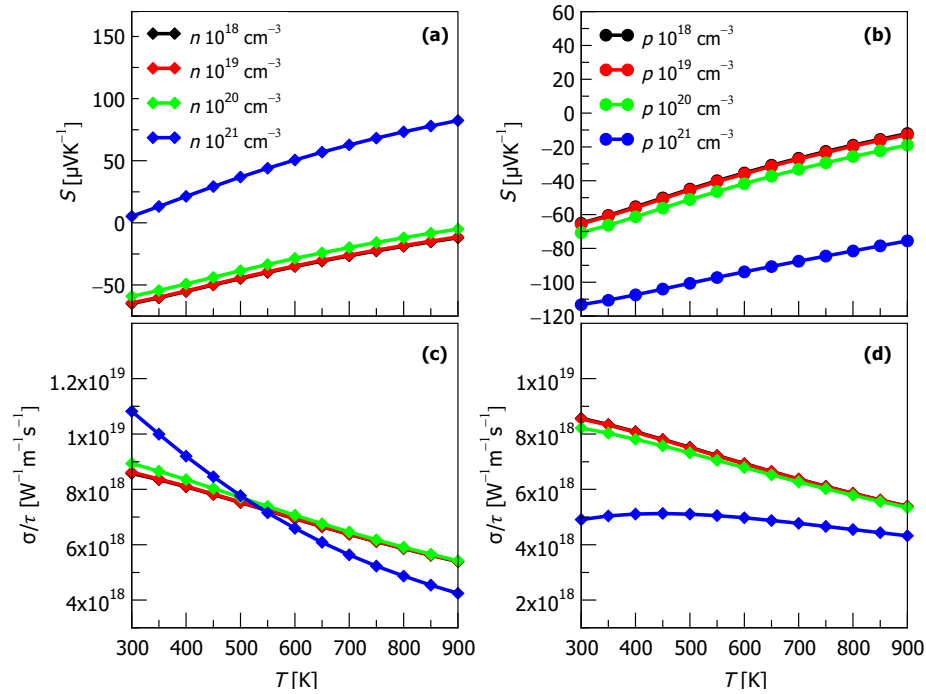

Figure S5: (a) and (b) Predicted  $S$  values for  $\text{Fe}_3\text{O}_4:\text{Nd}$  as a function of temperature for different doping concentrations. (c) and (d) The electrical conductivity per relaxation time ( $\sigma/\tau$ ) for  $\text{Fe}_3\text{O}_4:\text{Nd}$ .

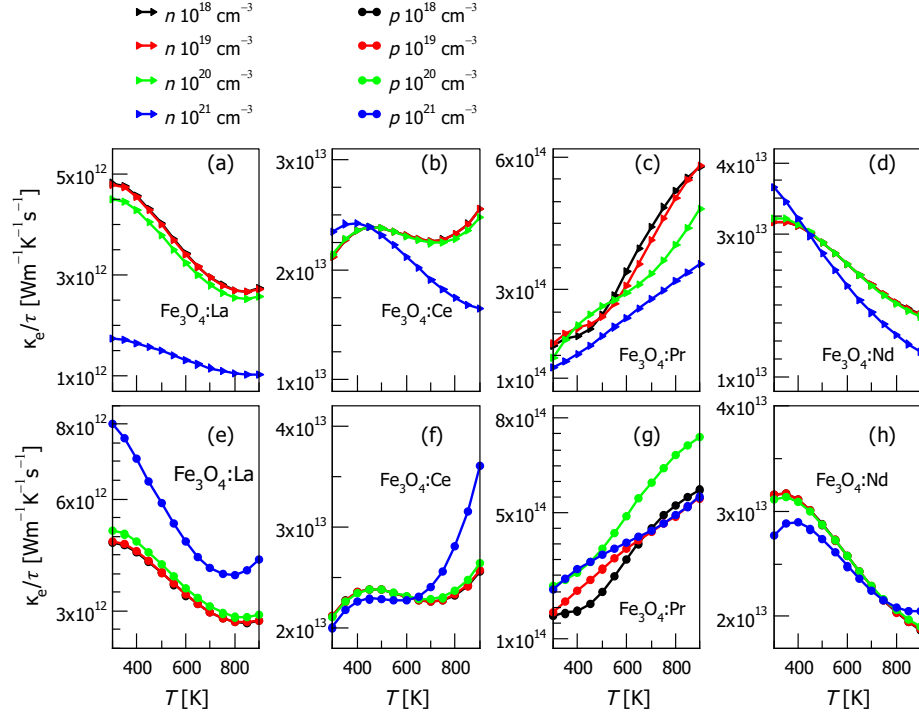

Figure S6: The electronic contribution to the thermal conductivity per relaxation time ( $\kappa_e/\tau$ ) in  $\text{Fe}_3\text{O}_4:\text{RE}$ .

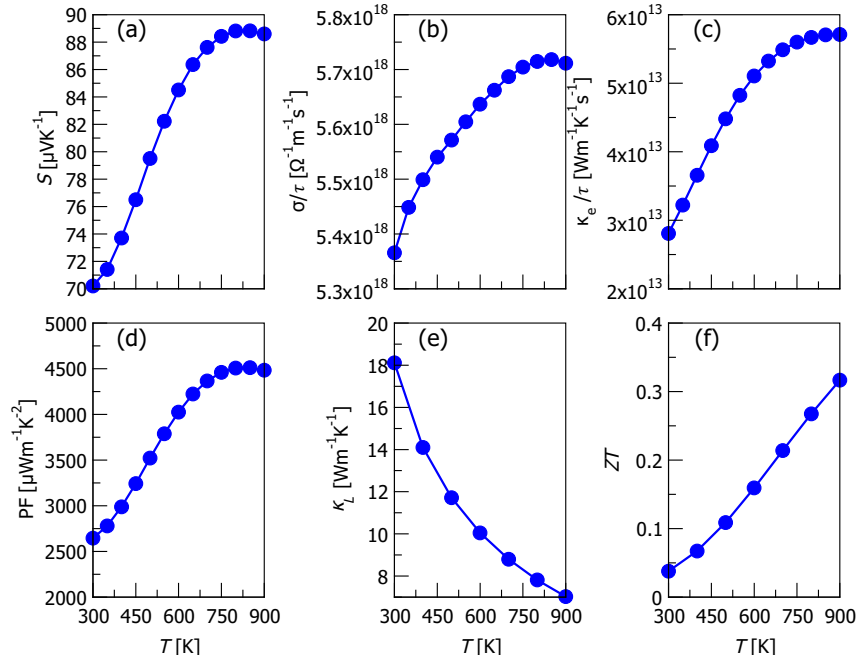

Figure S7: The transport and thermal properties of pristine  $\text{Fe}_3\text{O}_4$ . Here,  $\kappa_L$  was calculated using classical lattice dynamics with Lewis & Catlow force fields that were parameterized by being fit to data derived from experimental measurements of iron oxides [S1]. The obtained  $\kappa_L$  values have the same order of magnitude as the few reported experiments [S2, S3]. However, a perfect match is elusive as experimental samples always had a degree of porosity. It is known that increased porosity can reduce  $\kappa_L$  by an order of magnitude [S4]. The classical lattice dynamics calculations were  $\sim 100$  times more resource-efficient than the ones based on *ab initio* calculations.

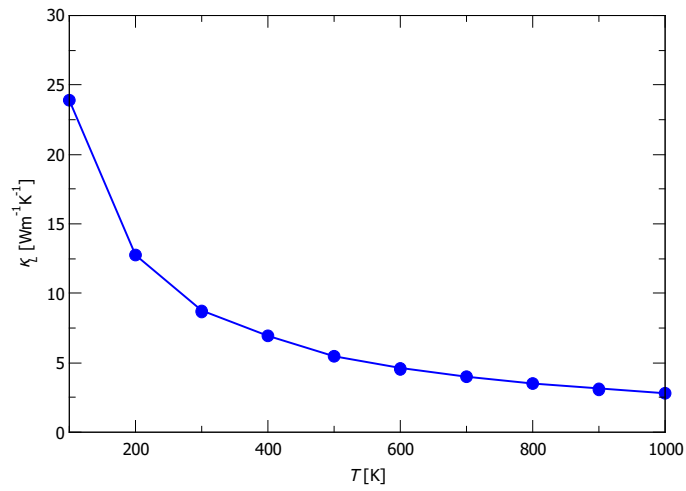

Figure S8:  $\kappa_L$  for Nd-doped  $\text{Fe}_3\text{O}_4$  calculated using classical lattice dynamics based on Lewis & Catlow force fields. At higher temperatures, there is a reasonable agreement with the machine-learning force field results reported in Fig. 4. At lower temperatures, nonetheless, the results based on Lewis & Catlow force fields are up to  $\sim 3$  times larger than those from machine-learning force fields. The disparity might stem from the fact that in the Lewis & Catlow force fields, the Nd–O interaction was parametrized based on neodymium oxide with an equilibrium bond length of 2.365 Å. However, in Nd-doped  $\text{Fe}_3\text{O}_4$ , the Nd–O bond length is 2.321 Å. In this case, the technique based on *ab initio* calculations seems more reliable.

## Supplementary Table

Table S1: The total DFT energy of the elemental dopants in metal form ( $E^{\text{DFT}}(\text{RE})$ ), the formation energies of the four rare-earth doped magnetite ( $\Delta H$ ) studied, and their corresponding effective mass ( $m^*$ ). The small variation in  $m_e^*$  and  $m_h^*$  justifies the constant  $\tau$  approximation throughout the calculations.

| Compound                           | $E^{\text{DFT}}(\text{RE})$ (eV/atom) | $\Delta H$ (eV) | $m_e^*$ ( $m_0$ ) | $m_h^*$ ( $m_0$ ) |
|------------------------------------|---------------------------------------|-----------------|-------------------|-------------------|
| Fe <sub>3</sub> O <sub>4</sub> :La | -19.1035                              | 4.7820          | 5.88              | -1.18             |
| Fe <sub>3</sub> O <sub>4</sub> :Ce | -19.0835                              | 4.9327          | 5.88              | -1.18             |
| Fe <sub>3</sub> O <sub>4</sub> :Pr | -36.2322                              | 4.2288          | 5.56              | -2.95             |
| Fe <sub>3</sub> O <sub>4</sub> :Nd | -29.1788                              | 4.1644          | 5.90              | -1.26             |

## References

- [S1] G. Lewis, C. Catlow, Potential models for ionic oxides, *J. Phys. C* 18 (6) (1985) 1149–1161. doi:<https://doi.org/10.1088/0022-3719/18/6/010>.
- [S2] J. Mølgaard, W. Smeltzer, Thermal conductivity of magnetite and hematite, *J. Appl. Phys.* 42 (9) (1971) 3644–3647. doi:<https://doi.org/10.1063/1.1660785>.
- [S3] Y. Grosu, A. Faik, I. Ortega-Fernández, B. D’Aguanno, Natural magnetite for thermal energy storage: Excellent thermophysical properties, reversible latent heat transition and controlled thermal conductivity, *Sol. Energy Mater. Sol. Cells* 161 (2017) 170–176. doi:<https://doi.org/10.1016/j.solmat.2016.12.006>.
- [S4] I. Sumirat, Y. Ando, S. Shimamura, Theoretical consideration of the effect of porosity on thermal conductivity of porous materials, *J. Porous Mater.* 13 (2006) 439–443. doi:<https://doi.org/10.1007/s10934-006-8043-0>.
